# Supplementary material for: Hiding in plain sight: use of realistic surrogates to reduce exposure of protected health information in clinical text
Source: Oxford University Press journal article supplement (doi:10.1136/amiajnl-2012-001034), 2012-07-08
Supplement: 20-2-342_Supplementary_Data.zip [file 20-2-342_Supplementary_Data.zip]

Archive with 3 entries (3 files):
- supp_amiajnl-2012-001034_amiajnl-2012-001034-s2.pdf
- supp_amiajnl-2012-001034_amiajnl-2012-001034-s3.pdf
- supp_amiajnl-2012-001034_amiajnl-2012-001034-s1.pdf
