# Supplementary material for: Hiding in plain sight: use of realistic surrogates to reduce exposure of protected health information in clinical text
Source: Oxford University Press journal article supplement (doi:10.1136/amiajnl-2012-001034), 2012-07-08
Supplement: 20-2-342_Supplementary_Data.zip [file 20-2-342_Supplementary_Data.zip › supp_amiajnl-2012-001034_amiajnl-2012-001034-s3.pdf]

# Hiding in Plain Sight: Use of Realistic Surrogates to Reduce Exposure of Protected Health Information in Clinical Text

David Carrell<sup>1</sup>, Bradley Malin<sup>2,3</sup>, John Aberdeen<sup>4</sup>, Samuel Bayer<sup>4</sup>, Cheryl Clark<sup>4</sup>, Benjamin Wellner<sup>4</sup>, Lynette Hirschman<sup>4</sup>

<sup>1</sup>Group Health Research Institute, Seattle, WA, USA

<sup>2</sup>Department of Biomedical Informatics, Vanderbilt University, Nashville, TN

<sup>3</sup>Department of Electrical Engineering and Computer Science, Vanderbilt University, Nashville, TN, USA

<sup>4</sup>The MITRE Corporation, Bedford, MA, USA

## Appendix C: The MIST Replacement Engine

This appendix describes the methods implemented in the MITRE Identification Scrubber Toolkit (MIST) to replace actual identifiers found in clinical text with surrogate identifiers to implement a Hiding in Plain Sight (HIPS) approach to clinical text de-identification.

### ***Introduction***

The MITRE Identification Scrubber Toolkit (MIST) (1) decomposes the de-identification task into two steps: first, the *identification* of PHI, and second, the *replacement* of PHI with surrogates. The replacement engine which implements this second step may be used independently of MIST, and essentially maps free-text documents containing PHI annotations into documents where the content of those annotations has been replaced.

### ***Overall design***

The replacement engine works on free-text documents containing PHI annotations, which consist of a label (e.g., PHONE, PATIENT, DOCTOR, CITY, AGE, etc.) and a pair of character offsets indicating the position of that annotation in the text. The inventory of labels is determined by the sites using MIST, but can be expected to cover at least the identifier types specified in the Safe Harbor de-identification method of the HIPAA Privacy Rule. The engine pairs a *digestion strategy*, which extracts feature values associated with the text of the annotation, with a *replacement strategy*, which generates surrogates for the input. These strategies might digest or produce clear documents, which contain intelligible English; documents which contain completely obscured PHI text, such as "[PERSON]" or "[AGE]"; or documents which contain partially informative PHI text, such as patterns like "\*\*\*NAME<AAA BBB>" produced by the De-ID tool (2). We can use this engine, then, to resynthesize natural-appearing English from already-obscured documents; to produce completely obscured documents from original records; or to convert directly from original clear text to resynthesized clear text. This last conversion supports Hiding in Plain Sight (HIPS); in the remainder of this appendix, we focus on this last conversion.

Each PHI label is paired with a *replacement category*, which manages the surrogate generation process for the semantic class of the PHI label. For instance, there might be a PATIENT and a DOCTOR label, but both might be paired with the PERSON replacement category, if the replacement semantics are the same. For each label, the engine creates a *replacer* of the appropriate replacement category, which encapsulates the category-specific semantics of the surrogate generation process. For each PHI annotation, the replacer creates a *PHI pattern*, and the digestion strategy populates that pattern with the feature values extracted from the input PHI annotation. Once all the patterns have been populated for a given document, the replacement strategy produces the surrogate.

### ***Strategies for the various PHI replacement categories***

The PHI replacement categories use a variety of feature extraction strategies and information sources. In this section, we review the major categories. We will use the example annotated clinical text in Figure 1 for reference, in which we have indicated the label and position of the PHI annotations.

[PATIENT Ann Bryant] presented to [HOSPITAL Oak Valley Health Center] on [DATE 12/23/07] with cough of 10 days duration and fever. Ms. [PATIENT Bryant] resides in a suburb of [PLACE Columbus, Ohio]. Dr. [DOCTOR Vincent Philbin] referred to radiology at [PLACE OVHC]. Chest X-ray performed on [DATE Christmas Day].

Figure 1. An example annotated clinical note.

[PATIENT Maria Furness] presented to [HOSPITAL Chapman University Hospital] on [DATE 4/15/08] with cough of 10 days duration and fever. Ms. [PATIENT Furness] resides in a suburb of [PLACE Frankton, Indiana]. Dr. [DOCTOR Josiah Humphries] referred to radiology at [PLACE CUH]. Chest X-ray performed on [DATE 15 Feb 2012].

Figure 2. The example annotated clinical note, transformed.

### ***PERSON***

For PERSON, the digestion strategy attempts to extract features, such as i) whether the last name or first name appears first, ii) whether the phrase consists only of a single name token, iii) the gender of the name, iv) whether there are middle initials, and v) the capitalization status of the name (upper, lower, or mixed). (Note: When the source document consists of partially or completely obscured PHI fillers, the feature extraction phase is augmented by a set of category-specific frequencies which are used to randomly populate the pattern; we'll ignore that capability, for all features, for the remainder of this appendix.) In example 1, there are three PHI annotations which are governed by the PERSON category: two PATIENT annotations and one DOCTOR annotation. The PHI annotation "Vincent Philbin", for instance, has the first name first (as opposed to "Philbin, Vincent"), is mixed case, and has no middle names or initials.

This category uses three information sources: 1) the US Census list of first and last names (3), 2) a list of nicknames (4), and 3) a list of mixed-case names (assembled from various resources found at (5)) used to provide proper capitalization for the all-uppercase Census name list. To determine gender, we post-processed and hand-reviewed the Census name lists to extract a list of clearly gender-ambiguous first names, and the engine assigns male or female gender to the pattern only if the name is known to be unambiguous. The first name "Vincent", for example, appears only in the male first name list, so "Vincent Philbin" in our example will be marked as male.

During surrogate generation, we use the frequency information in the Census data to make a weighted random choice of replacement first name from the appropriate list (gender-neutral, male, female) and similarly for the last name. Putting all these pieces together, a candidate surrogate for "Vincent Philbin" might be "Josiah Humphries", as shown in Figure 2: an unambiguously male first name, of mixed case, consisting of two tokens, with the first name first.

## *LOCATION*

For LOCATION, the digestion strategy attempts to extract features such as: i) whether there is a street name and number; ii) whether there is a ZIP code; iii) whether there is a city or state; and iv) whether there is a comma between the city and the state. The digestion strategy works backward from the end of the pattern, first looking for the ZIP code, then a state, then the city, then the street. The replacement engine defines multiple types of LOCATION patterns, which are restricted to various subparts of the address, if the particular application prefers to decompose it. (Note: There is also a separate COUNTRY pattern, but its discussion is beyond the scope of this appendix.) In our example, the PLACE annotation is governed by the LOCATION category; and our replacement will contain a city, followed by a comma, followed by a state, as shown in Figure 2.

This category uses a variety of information sources. First, it uses a table of <ZIP code, state, city> triples, borrowed from the UIS database generator (6), to generate plausible surrogates. For example, a surrogate zip code is created by retaining the leftmost two digits in a five-digit zip code, and replacing the rightmost three digits from the list of plausible zip codes. Second, it uses a list of states and their possible abbreviations (7) to recognize states. Third, it uses a list of street abbreviations provided by the US Postal Service (8) to both recognize and generate plausible address surrogates; and it uses a list of road names extracted from Massachusetts GIS data (9) to generate plausible road name surrogates.

## *DATE*

The DATE category uses a modified version of the Python *dateutil* package (10) to recognize and extract an enormous variety of data about dates, including (but not limited to) i) whether the year is two or four digits; ii) whether the month is a number or a long or short name; iii) what sort of separator is used between the components; and iv) whether a day name is present. The package produces both a digested date and the detailed pattern. To produce the surrogate, the engine establishes a date offset for the entire document, applies the offset to each digested date, and formats the surrogate date using the pattern details from the input date. If the date parser is unable to parse the date, the

engine chooses a random date within the last year as a seed, and uses a weighted list of date patterns to select a pattern for the date surrogate.

The example in Figure 1 contains two DATE annotations, which are governed by the DATE category. The first consists of a month number, followed by a slash, followed by a day number, followed by a slash, followed by a two-digit year, and its surrogate will follow the same pattern. The second, "Christmas Day", cannot be parsed, and will be replaced by a random date surrogate within the last year, with a randomly selected pattern, as shown in Figure 2.

### *Other patterns*

The engine attempts to digest, extract and reuse pattern information from some of the remaining patterns (e.g., AGE, PHONE, EMAIL, URL); for others, such as SSN, it performs no analysis. In addition, for some of these patterns, the engine uses sample replacement data resources (e.g., area codes for PHONE, hospital names for HOSPITAL, and sample URL fragments for URL), but for many others (e.g., AGE), the surrogate generation is completely algorithmic. The strategies for PERSON, LOCATION and DATE are by far the most complex in terms of their strategies and resource use.

### *Caching and co-reference*

For each of the categories, the engine is designed to ensure that PHI annotations which are identical to each other (e.g., a repetition of an email address, ID number, etc.) are mapped to the same surrogate each time. To do so, each replacer maintains a case-insensitive cache for its label. When the replacer attempts to apply the replacement strategy, it consults the cache and if it finds the input, it uses the corresponding surrogate. If the cache fails to contain the value, the replacer applies the replacement strategy and stores the resulting surrogate in the cache.

For labels associated with the PERSON and HOSPITAL categories, the possibilities are more complex because it is possible to refer to these entities in more than one way. For instance, in Figure 1, the PATIENT annotation "Ann Bryant" is followed later by "Bryant", and the HOSPITAL annotation "Oak Valley Health Center" is followed later by the abbreviation "OVHC". In these cases, the replacer relies on a second cache, for which it generates a set of alternative keys from the input. These keys map to surrogate seeds, which are structured information (e.g., a first and last name) that can be rendered in a variety of ways. In these cases, the seed is reused and the pattern feature values extracted from the input are applied to that seed. For example, if "Ann Bryant" is replaced by "Maria Furness", a later reference to "Bryant" will be replaced by "Furness", as shown in Figure 2.

Without instituting much deeper semantic analysis, it is not possible to maintain all these co-references perfectly. However, there are strategies the engine applies to simulate some of the relevant techniques. For instance, by gender-matching the names, and ensuring that the engine replaces any names for which it is not certain of the gender with clearly gender-neutral names, the engine increases the likelihood that a reader of the resynthesized document will make the same inferences about the references of pronouns like "he" as a reader of the original document would.

### *Customization options*

The engine can be customized in a number of ways. Most of these customizations are only available in the context of MIST; however, this limitation is expected to be relaxed in the future. In a number of cases, these customizations would be provided by the engine maintainer, rather than the engine user.

- The user or maintainer can provide local resource lists. For instance, instead of using the list of replacement names for HOSPITAL annotations that is provided with the engine, the user can provide a list which might be more relevant to the local site. All of the existing resources can be overridden in this way.
- The user can customize the replacement in certain ways. For DATE, for instance, the user can specify what the date offset should be. As another example, for ID, the user can enforce a particular surrogate for each input ID (e.g., if the user wants to synchronize the replacement engine with a known set of synthesized surrogates for a separate, structured dataset). For PERSON, the user can specify the content of the surrogate seed.
- The maintainer can map PHI labels to the OTHER category, to support local specialized replacement types. The OTHER category will capture and optionally preserve the capitalization status of the input and whether it is an abbreviation or not. The maintainer can provide the engine with an arbitrary resource list of replacements to draw from.
- The user can enable case-sensitive caching for individual categories.
- The user can change the scope of the cache. By default, the scope of the caches is the document. The user can change this to the batch of documents that is being processed or turn off caching entirely.
- The user can provide a prologue to be inserted into the output file. This can be used, for example, to insert a statement at the beginning of each processed document alerting the reader to the fact that it has been de-identified with natural-appearing but fictional surrogates.
- The user can flag unparseable inputs. As stated earlier, the DATE replacement strategy will generate a random date surrogate if parsing fails, as in the case of "Christmas Day", and as Figure 2 illustrates, the consistency of the date sequence is not preserved in these cases. The user can force the replacement process to fail if these unparseable inputs are not reviewed and explicitly modified or approved.
- The maintainer can force a replacer to apply a pattern other than the one derived from the input annotation. The maintainer might choose this pattern from a separate inventory of patterns, or from the set of patterns extracted from all the annotations of that type during the processing run. These alternatives have their merits, but the engine does not use them by default because their behavior is non-deterministic and hard to evaluate.

- The maintainer can define an entirely new replacement category. This is fairly challenging, however, because it involves extending the implementations of the digestion and replacement strategies.

### *Limitations*

At the moment, the replacement engine works only with English. It is exceptionally sensitive to language- and culture-specific forms of names, locations and dates, and cannot easily be modified to target other languages.

## **REFERENCES for APPENDIX B**

1. Aberdeen J, Bayer S, Yeniterzi R, Wellner B, Clark C, Hanauer D, et al. The MITRE Identification Scrubber Toolkit: Design, training, and assessment. *Int J Med Inform* 2010; 79: 849-59.
2. Gupta D, Saul M, Gilbertson J. Evaluation of a deidentification (DE-ID) software engine to share pathology reports and clinical documents for research. *Am J Clin Pathol* 2004; 121:176-86.
3. [http://www.census.gov/genealogy/names/names\\_files.html](http://www.census.gov/genealogy/names/names_files.html)
4. <http://www.usgenweb.org/researchers/nicknames.html> (no longer available), accessed via <http://web.archive.org>
5. <ftp://ftp.ox.ac.uk/pub/wordlists/names>
6. Duplicate Detection, Record Linkage, and Identity Uncertainty: Datasets. <http://www.cs.utexas.edu/users/ml/riddle/data.html>
7. State Abbreviations for the United States of America. <http://www.stateabbreviations.us>
8. Official USPS abbreviations. <https://www.usps.com/send/official-abbreviations.htm>, originally found at [http://www.usps.com/ncsc/lookups/abbr\\_suffix.txt](http://www.usps.com/ncsc/lookups/abbr_suffix.txt) (no longer available)
9. MassGIS - MassDOT Roads Datalayer Description. <http://www.mass.gov/mgis/eotroads.htm>
10. <http://labix.org/python-dateutil>.
